# Supplementary material for: Concurrent Evolution of Biomechanical and Physiological Parameters With Running-Induced Acute Fatigue
Source: Front Physiol. 2022 Feb 11;13:814172. doi: 10.3389/fphys.2022.814172 (PMC8874325; doi:10.3389/fphys.2022.814172)
Supplement: Supplementary file 1 [file Table_1.XLSX]

## Sheet: Participant details
Id	Age	Height	Weight	Sex	Race time	ROF		Borg scale		ROF across race segments
		(cm)	(kg)		(minutes)	start	end	start	end	1	2	3	4	5	6	7	8
1	24	180	73	M	118	1	7	6	17	1	3	3	4	4	4	6	7
2	37	190	72.5	M	85	1	9	7	16	1	4	5	5	6	7	8	9
3	34	182	70	M	96	4	9	7	17	4	5	6	7	7	8	8	9
4	43	188	78	M	87	4	7	6	15	4	6	6	6	6	6	7	7
5	42	173	70	M	80	6	9	7	19	6	6	6	7	7	7	8	9
6	34	174	73	M	103	3	9	8	19	3	4	5	6	6	7	8	9
7	35	184	85	M	98	6	10	7	20	6	5	5	6	7	8	9	10
8	31	183	80	M	115	4	9	8	19	4	5	5	6	6	7	8	9
9	44	177	60	F	87.4	2	8	6	17	2	2	3	4	5	6	7	8
10	52	184	78.5	M	104	4	9	8	16	4	6	7	7	8	8	8	9
11	26	157	46	F	107.4	5	9	6	11	5	5	5	5	4	6	6	9
12	30	174	61	M	85.3	2	9	7	17	2	2	3	4	5	6	6	9
13	30	187	88	M	113.3	3	7	8	18	3	3	4	4	5	6	6	7

## Sheet: A1,2,3
Normalized metrics		No walkers																									Key
		Segment-wise								ROF-wise								delta ROF-wise
		Friedman test		Wilcoxon signed-rank test						Friedman test		Wilcoxon signed-rank test						Friedman test		Wilcoxon signed-rank test							Reference: https://bit.ly/36Uc27a
				S1 <> S5		S5 <> S8		S1 <> S8				Low <> Med		Med <> High		Low <> High				0 <> 1,2		0 <> 3,4		0 <> ≥5			Significance: p<0.05
Parameter	Units	p-value	ES	p-value	ES	p-value	ES	p-value	ES	p-value	ES	p-value	ES	p-value	ES	p-value	ES	p-value	ES	p-value	ES	p-value	ES	p-value	ES
Contact time	ms	0.000749519	0.553544	0.00147378	0.62361	0.937473	0.0153846	0.00297664	0.582492	0.00470091	0.412308	0.00443909	0.557979	0.0843794	0.338462	0.0037286	0.568787	2.68158e-05	0.611602	0.00334562	0.575416	0.00187143	0.609904	0.00187143	0.609904			Significant with high ES >0.5
Flight time	ms	0.116037	0.16568	0.0868601	0.33579	0.421579	0.157616	0.151956	0.280967	0.465471	0.0588235	0.307821	0.2	0.382352	0.171321	0.151956	0.280967	0.259728	0.102978	0.115851	0.308378	0.100525	0.322084	0.100525	0.322084
Swing time	ms	0.0918356	0.183673	0.116664	0.307692	0.0207952	0.453358	0.0463995	0.390613	0.115325	0.166154	0.593712	0.104621	0.0231298	0.445435	0.0277078	0.43173	0.276909	0.0989912	0.116664	0.307692	0.151956	0.280967	0.0277078	0.43173			Significant with medium ES (0.3,0.5]
Cycle time	ms	0.22979	0.113122	0.310897	0.198733	0.0640301	0.363201	0.9687	0.00769527	0.352227	0.0802676	0.284503	0.209895	0.0843794	0.338462	0.937473	0.0153846	0.51454	0.0587045	0.213223	0.244116	0.455953	0.14621	0.875329	0.0307692
Cadence	str/min	0.22979	0.113122	0.310897	0.198733	0.0640301	0.363201	0.937473	0.0153846	0.352227	0.0802676	0.284503	0.209895	0.0843794	0.338462	0.937473	0.0153846	0.63139	0.0442308	0.272095	0.215385	0.480177	0.138462	0.875329	0.0307692			Significant with low ES (0.1,0.3]
Pitch angle	deg	0.000574771	0.573964	0.172955	0.267261	0.00147378	0.62361	0.0277078	0.43173	0.00420876	0.420814	0.307821	0.2	0.00713241	0.52767	0.0131036	0.486553	0.00173642	0.387077	0.136097	0.292308	0.00877463	0.513964	0.0159064	0.472847
Eversion	deg	0.793923	0.0177515	0.151956	0.280967	0.552493	0.116498	0.278707	0.212438	0.942873	0.00452489	0.753684	0.0615385	0.382352	0.171321	0.310897	0.198733	0.758766	0.0301538	0.388186	0.169231	0.196051	0.253556	0.345448	0.185027
Peak swing vel.	deg/s	0.116037	0.16568	0.0277078	0.43173	0.172955	0.267261	0.0392433	0.404318	0.0409224	0.245852	0.116664	0.307692	0.132957	0.294673	0.0640301	0.363201	0.00356957	0.347692	0.0747355	0.349495	0.0037286	0.568787	0.0392433	0.404318
Stiffness	N/m	0.0323425	0.263952	0.0037286	0.568787	0.700703	0.0753814	0.0280561	0.430769	0.0797059	0.19457	0.00603956	0.538462	0.649644	0.0890871	0.0277078	0.43173	0.0106527	0.287385	0.00297664	0.582492	0.00464943	0.555081	0.0159064	0.472847
Duty factor	—	0.000911882	0.538462	0.00147378	0.62361	0.506746	0.130204	0.00297664	0.582492	0.00788229	0.372549	0.00474177	0.553846	0.0546239	0.376907	0.00297664	0.582492	5.62074e-06	0.694769	0.00236558	0.596198	0.00187143	0.609904	0.00236558	0.596198
Speed	m/s	0.367879	0.0769231	0.196051	0.253556	0.100525	0.322084	0.278707	0.212438	0.688976	0.0286576	0.694887	0.0769231	0.806766	0.04797	0.600179	0.102793	0.507178	0.0596923	0.600179	0.102793	0.421579	0.157616	0.593955	0.104552
Acc. norm	m/s^2	0.292068	0.0946746	0.382352	0.171321	0.806766	0.04797	0.421579	0.157616	0.774992	0.0196078	0.58292	0.107692	0.506746	0.130204	0.552493	0.116498	0.657577	0.0412308	0.649644	0.0890871	0.600179	0.102793	0.506746	0.130204
Acc. ML/speed	/s	0.292068	0.0946746	0.100525	0.322084	0.248864	0.226144	0.22133	0.23985	0.871748	0.0105581	0.307821	0.2	0.753152	0.0616757	0.506746	0.130204	0.59427	0.0486154	0.432768	0.153846	0.345448	0.185027	0.22133	0.23985
Acc. SG/speed	/s	3.6044e-05	0.786982	0.00147378	0.62361	0.649644	0.0890871	0.00147378	0.62361	0.00151825	0.499246	0.00287341	0.584615	0.972125	0.00685285	0.00187143	0.609904	0.000611944	0.443692	0.00297664	0.582492	0.00187143	0.609904	0.00187143	0.609904
bpm	beats/min	0.00727671	0.378698	0.0159064	0.472847	0.0159064	0.472847	0.00713241	0.52767	0.0159666	0.31825	0.0229091	0.446154	0.0463995	0.390613	0.0159064	0.472847	0.025697	0.238154	0.0392433	0.404318	0.0231298	0.445435	0.0159064	0.472847
SDNN	ms	0.00156239	0.497041	0.0159064	0.472847	0.248864	0.226144	0.0131036	0.486553	0.0112184	0.3454	0.0120633	0.492308	0.506746	0.130204	0.0192234	0.459141	0.103717	0.158154	0.22133	0.23985	0.0277078	0.43173	0.0277078	0.43173
RMSSD	ms	0.583645	0.0414201	0.421579	0.157616	0.753152	0.0616757	0.345448	0.185027	0.774992	0.0196078	0.875329	0.0307692	0.0868601	0.33579	0.382352	0.171321	0.564146	0.0523077	0.916512	0.0205586	0.700703	0.0753814	0.552493	0.116498
Alpha1	NA	0.925961	0.00591716	0.463071	0.14391	0.506746	0.130204	0.806766	0.04797	0.980583	0.0015083	0.937473	0.0153846	0.649644	0.0890871	0.861304	0.0342643	0.885361	0.0166154	0.506746	0.130204	0.806766	0.04797	0.861304	0.0342643
Alpha2	NA	0.0183156	0.307692	0.0277078	0.43173	0.463071	0.14391	0.00464943	0.555081	0.0112184	0.3454	0.0229091	0.446154	0.421579	0.157616	0.00577159	0.541375	0.0101906	0.289846	0.0463995	0.390613	0.0192234	0.459141	0.00877463	0.513964
SD1	ms	0.583645	0.0414201	0.421579	0.157616	0.753152	0.0616757	0.345448	0.185027	0.774992	0.0196078	0.875329	0.0307692	0.0868601	0.33579	0.382352	0.171321	0.564146	0.0523077	0.916512	0.0205586	0.700703	0.0753814	0.552493	0.116498
SD2	ms	0.00229523	0.467456	0.0159064	0.472847	0.310897	0.198733	0.00464943	0.555081	0.0136486	0.330317	0.00474177	0.553846	0.600179	0.102793	0.00577159	0.541375	0.115166	0.152	0.115851	0.308378	0.0107468	0.500258	0.00713241	0.52767
SD1SD2ratio	NA	0.00229523	0.467456	0.0131036	0.486553	0.649644	0.0890871	0.00297664	0.582492	0.00492355	0.408748	0.00603956	0.538462	0.463071	0.14391	0.00577159	0.541375	0.0113848	0.283692	0.0277078	0.43173	0.00577159	0.541375	0.00713241	0.52767
pLF	%	0.0124677	0.337278	0.0392433	0.404318	0.115851	0.308378	0.0640301	0.363201	0.0245785	0.285068	0.0341705	0.415385	0.22133	0.23985	0.0747355	0.349495	0.00522423	0.326769	0.132957	0.294673	0.0231298	0.445435	0.0330469	0.418024
pHF	%	0.0124677	0.337278	0.0330469	0.418024	0.0868601	0.33579	0.0277078	0.43173	0.0245785	0.285068	0.0280561	0.430769	0.172955	0.267261	0.0330469	0.418024	0.00522423	0.326769	0.0640301	0.363201	0.0131036	0.486553	0.0231298	0.445435
LF	ms^2	0.198814	0.12426	0.382352	0.171321	0.196051	0.253556	0.278707	0.212438	0.327048	0.0859729	0.694887	0.0769231	0.248864	0.226144	0.421579	0.157616	0.317149	0.0904615	0.600179	0.102793	0.345448	0.185027	0.552493	0.116498
HF	ms^2	0.0124677	0.337278	0.0277078	0.43173	0.278707	0.212438	0.0037286	0.568787	0.000506374	0.58371	0.00764908	0.523077	0.22133	0.23985	0.00147378	0.62361	0.000750898	0.432615	0.0392433	0.404318	0.00297664	0.582492	0.0037286	0.568787
LFHFratio	NA	0.0124677	0.337278	0.0463995	0.390613	0.0868601	0.33579	0.0640301	0.363201	0.0245785	0.285068	0.0413894	0.4	0.22133	0.23985	0.0640301	0.363201	0.00522423	0.326769	0.132957	0.294673	0.0231298	0.445435	0.0392433	0.404318
cardiac Cost	bpm/ms^2	0.20529	0.121795	0.0498602	0.384615	0.0994809	0.323077	0.0150223	0.476923	0.667474	0.0310966	0.130665	0.296426	0.937473	0.0153846	0.0413894	0.4	0.268112	0.101003	0.116664	0.307692	0.0843794	0.338462	0.0356919	0.411926

## Sheet: A4
Linear mixed-effect		fixed effect Ref (fast runners)								fixed effect (slow as compared to fast runners)								R squared
		intercept				slope				intercept				slope
Parameter	Units	estimate	pvalue	CI-lower	CI-upper	estimate	pvalue	CI-lower	CI-upper	estimate	pvalue	CI-lower	CI-upper	estimate	pvalue	CI-lower	CI-upper
Contact time	ms	194.802	7.14529e-47	180.366	209.238	3.76814	0.00195906	1.41821	6.11808	55.1394	5.53637e-07	34.7239	75.5548	-0.588736	0.727037	-3.92614	2.74867	0.953375
Flight time	ms	193.166	3.71474e-17	155.718	230.613	-2.10653	0.351464	-6.57169	2.35862	-54.0674	0.0454613	-107.021	-1.11374	-2.5535	0.423081	-8.8526	3.74559	0.994839
Swing time	ms	538.569	3.69236e-48	499.998	577.14	-1.92515	0.28813	-5.5022	1.6519	-32.2054	0.244135	-86.7478	22.337	-1.43686	0.572858	-6.47693	3.6032	0.984672
Cycle time	ms	710.022	2.89171e-59	671.819	748.224	0.889575	0.55626	-2.10032	3.87947	11.5386	0.6726	-42.4845	65.5618	-1.83107	0.390752	-6.04614	2.384	0.985546
Cadence	str/min	84.7043	1.96511e-58	80.0502	89.3585	-0.125024	0.456328	-0.456773	0.206725	-0.939279	0.777613	-7.52085	5.64229	0.202772	0.391713	-0.264955	0.670498	0.98813
Pitch angle	deg	6.26092	0.00664143	1.78104	10.7408	-0.358806	0.00933272	-0.627294	-0.0903188	7.76677	0.0167916	1.43157	14.102	-0.0920004	0.631192	-0.471126	0.287125	0.990244
Eversion	deg	-9.83174	0.0226668	-18.2576	-1.40582	-0.0289072	0.788096	-0.24175	0.183935	2.20237	0.714574	-9.71357	14.1183	0.173814	0.252593	-0.125902	0.47353	0.998674
Peak swing vel.	deg/s	673.027	1.00013e-56	634.414	711.64	-1.91886	0.298028	-5.55851	1.72079	-21.8922	0.428202	-76.4998	32.7154	-5.07082	0.055317	-10.2592	0.117591	0.948518
Stiffness	N/m	35390.8	3.10533e-29	31022.6	39758.9	-486.579	0.0437468	-959.24	-13.9182	-8028.96	0.0113757	-14205.5	-1852.39	228.647	0.49711	-437.071	894.364	0.980079
Duty factor	—	0.274387	5.49443e-40	0.24984	0.298935	0.00495101	0.00665117	0.00140775	0.00849427	0.0741045	5.12489e-05	0.0393958	0.108813	-0.000313497	0.901467	-0.00532539	0.00469839	0.960987
Speed	m/s	3.38103	3.4368e-44	3.11171	3.65034	-0.0376495	0.0575122	-0.0765229	0.00122395	-0.673815	0.000700194	-1.05579	-0.291842	0.0307865	0.324869	-0.0309584	0.0925315	0.764666
Acc. norm	m/s^2	8.74955	7.21002e-15	6.85858	10.6405	0.0225277	0.519027	-0.0465493	0.0916047	-0.586786	0.664222	-3.26117	2.0876	-0.0433421	0.405743	-0.146348	0.059664	0.98155
Acc. ML/speed	/s	0.0971703	0.103569	-0.0201885	0.214529	-0.00113354	0.838973	-0.0121741	0.00990697	-0.0234299	0.779933	-0.189382	0.142523	0.00475934	0.54681	-0.0108609	0.0203796	0.972646
Acc. SG/speed	/s	0.690544	2.99726e-20	0.573139	0.807949	0.0382935	0.000258071	0.0182555	0.0583315	-0.26906	0.00176727	-0.43514	-0.102979	0.0141391	0.345901	-0.0154857	0.0437638	0.865654
bpm	beats/min	0.162932	5.43893e-37	0.148598	0.177265	0.00308565	0.00816723	0.000821467	0.00534983	0.00167966	0.869259	-0.0185569	0.0219162	-0.00128539	0.412828	-0.00439194	0.00182115	0.925977
SDNN	ms	4.49797	4.51226e-14	3.51489	5.48104	-0.172288	0.256899	-0.472484	0.127908	0.797717	0.251693	-0.576959	2.17239	-0.0113362	0.955115	-0.410779	0.388107	0.571319
RMSSD	ms	5.1198	1.10613e-15	4.09243	6.14716	0.0382007	0.699001	-0.157644	0.234045	-1.16911	0.112344	-2.61819	0.279968	0.150237	0.26817	-0.117843	0.418317	0.9544
Alpha1	NA	0.568694	9.27486e-09	0.3918	0.745587	-0.0237643	0.29383	-0.0685098	0.0209811	0.429277	0.000950493	0.180232	0.678323	-0.0216096	0.484755	-0.0828592	0.0396399	0.91659
Alpha2	NA	1.04701	1.44936e-09	0.741471	1.35254	-0.0201783	0.380725	-0.0657253	0.0253687	0.0736881	0.733575	-0.35552	0.502897	-0.0484034	0.113715	-0.10863	0.0118234	0.737852
SD1	ms	3.62003	1.11268e-15	2.89352	4.34654	0.0270844	0.698225	-0.111395	0.165564	-0.826635	0.112391	-1.85136	0.198091	0.106186	0.268367	-0.0833685	0.295741	0.954396
SD2	ms	5.0042	4.37657e-09	3.48826	6.52014	-0.246957	0.214574	-0.639734	0.145821	1.8917	0.080966	-0.238129	4.02154	-0.11188	0.674672	-0.640218	0.416458	0.521381
SD1SD2ratio	NA	0.764824	3.4664e-11	0.565883	0.963765	0.0256562	0.104066	-0.00539463	0.0567071	-0.370508	0.0100742	-0.650291	-0.0907254	0.0286406	0.187181	-0.0141955	0.0714767	0.675841
pLF	%	12.4239	5.37195e-07	7.88143	16.9663	-0.419782	0.334461	-1.2799	0.440341	14.169	2.99772e-05	7.79205	20.5459	-2.32469	0.000105504	-3.45936	-1.19002	0.812055
pHF	%	87.5761	3.83715e-54	83.0337	92.1186	0.419782	0.334461	-0.440341	1.2799	-14.169	2.99772e-05	-20.5459	-7.79205	2.32469	0.000105504	1.19002	3.45936	0.812055
LF	ms^2	1.88585	8.77053e-10	1.34449	2.42721	-0.0287149	0.380399	-0.0934862	0.0360565	1.44541	0.000303623	0.683322	2.20751	-0.211072	5.99694e-06	-0.297812	-0.124333	0.881433
HF	ms^2	14.1552	2.58011e-15	11.2605	17.0499	0.191936	0.47154	-0.335935	0.719807	-4.79105	0.0213278	-8.85164	-0.730451	0.777055	0.0337914	0.0609932	1.49312	0.546805
LFHFratio	NA	0.143343	2.8983e-05	0.0789614	0.207725	-0.00499249	0.413457	-0.0170747	0.00708972	0.214539	9.59692e-06	0.124116	0.304962	-0.0373457	1.2952e-05	-0.0533503	-0.0213411	0.817212
cardiac Cost	bpm/ms^2	14.7801	8.40101e-07	9.26573	20.2944	0.190321	0.320276	-0.188306	0.568948	3.93996	0.317044	-3.84577	11.7257	-0.231232	0.364005	-0.735152	0.272687	0.934105

## Sheet: Parameter values
Median ± IQR values		Race segments
Parameter	Units	1	2	3	4	5	6	7	8
Contact time	ms	221.49 ± 43.64	225.18 ± 49.18	227.64 ± 47.95	225.18 ± 51.02	239.93 ± 51.02	239.93 ± 52.25	242.39 ± 53.48	244.03 ± 47.33
		1 ± 0.05	1 ± 0.03	1 ± 0.04	1 ± 0.03	1.02 ± 0.03	1.04 ± 0.04	1.03 ± 0.05	1.03 ± 0.09
Flight time	ms	175.78 ± 78.13	173.83 ± 91.06	171.88 ± 100.10	167.97 ± 105.22	160.16 ± 105.22	160.16 ± 116.70	154.30 ± 121.34	152.34 ± 130.37
		1 ± 0.03	0.99 ± 0.06	1 ± 0.11	1 ± 0.13	0.98 ± 0.12	0.98 ± 0.18	0.99 ± 0.21	1 ± 0.30
Swing time	ms	535.16 ± 47.85	539.06 + 47.85	541.02 ± 44.43	539.06 ± 35.16	541.02 ± 60.55	539.06 ± 59.08	535.16 ± 63.48	531.25 ± 53.22
		1 ± 0.00	1 ± 0.02	1 ± 0.01	1 ± 0.00	0.99 ± 0.02	0.99 ± 0.03	0.99 ± 0.04	0.98 ± 0.05
Cycle time	ms	744.14 ± 70.31	744.14 ± 60.06	740.23 ± 56.64	738.28 ± 50.78	744.14 ± 46.39	738.28 ± 55.18	732.42 ± 51.27	732.42 ± 43.46
		1 ± 0.01	1.00 ± 0.02	1 ± 0.01	1 ± 0.00	1.00 ± 0.02	1.00 ± 0.02	1.00 ± 0.02	1 ± 0.02
Cadence	str/min	80.63 ± 8.18	80.63 ± 6.82	81.06 ± 6.44	81.27 ± 5.76	80.63 ± 5.28	81.27 ± 6.23	81.92 ± 5.83	81.92 ± 5.03
		1 ± 0.01	1.00 ± 0.02	1 ± 0.01	1 ± 0.00	1 ± 0.02	1 ± 0.02	1 ± 0.02	1 ± 0.02
Pitch angle	deg	10.72 ± 7.42	10.84 ± 6.49	10.66 ± 6.79	10.19 ± 6.51	10.56 ± 7.08	10.60 ± 7.07	9.90 ± 7.05	9.50 ± 5.13
		1 ± 0.01	0.98 ± 0.11	1 ± 0.10	1 ± 0.06	0.94 ± 0.11	0.98 ± 0.13	0.87 ± 0.13	0.82 ± 0.16
Eversion	deg	-10.77 ± 8.20	-10.34 ± 8.64	-10.93 ± 8.86	-11.26 ± 8.98	-11.45 ± 8.16	-11.12 ± 8.45	-11.52 ± 7.24	-11.85 ± 6.45
		1 ± 0.01	0.98 ± 0.06	0.99 ± 0.06	1 ± 0.07	0.95 ± 0.10	0.94 ± 0.12	0.93 ± 0.13	0.92 ± 0.16
Peak swing vel.	deg/s	658.23 ± 63.30	651.74 ± 67.00	660.19 ± 60.15	660.65 ± 46.27	652.03 ± 59.20	655.47 ± 59.66	641.27 ± 84.56	645.89 ± 75.01
		1 ± 0.02	1.00 ± 0.03	1.00 ± 0.05	1 ± 0.04	1 ± 0.02	0.99 ± 0.03	0.98 ± 0.04	0.99 ± 0.04
Stiffness	10^4 N/m	3.45 ± 0.99	3.34 ± 1.05	3.39 ± 1.07	3.29 ± 1.19	3.23 ± 1.08	3.26 ± 1.09	3.17 ± 0.085	3.18 ± 0.77
		1 ± 0.06	0.99 ± 0.05	1 ± 0.06	1 ± 0.05	0.98 ± 0.04	0.99 ± 0.06	0.99 ± 0.05	0.99 ± 0.07
Duty factor	—	0.29 ± 0.06	0.30 ± .06	0.30 ± 0.06	0.30 ± 0.07	0.32 ± 0.07	0.33 ± 0.07	0.33 ± 0.08	0.33 ± 0.06
		1 ± 0.04	1 ± 0.03	1.01 ± 0.03	1.01 ± 0.02	1.02 ± 0.02	1.03 ± 0.04	1.04 ± 0.05	1.04 ± 0.08
Speed	m/s	2.94 ± 0.67	2.85 ± 0.79	3.15 ± 0.71	3.00 ± 0.59	2.82 ± 0.52	2.80 ± 0.42	2.79 ± 0.64	2.89 ± 0.73
		1 ± 0.09	0.91 ± 0.13	0.99 ± 0.05	0.99 ± 0.15	0.85 ± 0.13	0.92 ± 0.12	0.90 ± 0.08	0.93 ± 0.11
Acc. ML/speed	/s	0.10 ± 0.20	0.12 ± 0.16	0.10 ± 0.14	0.09 ± 0.13	0.11 ± 0.14	0.11 ± 0.16	0.10 ± 0.21	0.10 ± 0.20
		1 ± 0.04	0.97 ± 0.53	1 ± 0.56	1 ± 0.65	1.12 ± 0.63	1.10 ± 0.67	1.11 ± 0.49	1.13 ± 0.50
Acc. SG/speed	/s	0.46 ± 0.28	0.63 ± 0.23	0.62 ± 0.15	0.63 ± 0.19	0.68 ± 0.15	0.70 ± 0.22	0.69 ± 0.32	0.68 ± 0.38
		1 ± 0.22	1.21 ± 0.48	1.03 ± 0.38	1.24 ± 0.44	1.26 ± 0.34	1.30 ± 0.50	1.32 ± 0.44	1.22 ± 0.56
bpm	beats/min	163.33 ± 9.13	166.11 ± 10.10	166.06 ± 9.19	170.19 ± 11.29	168.20 ± 9.83	169.88 ± 10.43	170.33 ± 10.12	172.33 ± 11.89
		1 ± 0	1.02 ± 0.03	1.03 ± 0.04	1.02 ± 0.07	1.03 ± 0.06	1.04 ± 0.08	1.05 ± 0.09	1.05 ± 0.11
SDNN	ms	4.95 ± 1.34	4.82 ± 1.78	3.97 ± 1.45	3.63 ± 1.28	4.26 ± 1.49	3.90 ± 1.05	3.99 ± 0.90	3.73 ± 1.10
		1 ± 0	0.89 ± 0.30	0.81 ± 0.19	0.80 ± 0.13	0.86 ± 0.24	0.85 ± 0.27	0.77 ± 0.24	0.75 ± 0.17
Alpha1	NA	0.54 ± 0.44	0.61 ± 0.46	0.57 ± 0.44	0.58 ± 0.24	0.59 ± 0.31	0.59 ± 0.25	0.58 ± 0.30	0.58 ± 0.20
		1 ± 0	0.98 ± 0.18	0.97 ± 0.15	1.0 ± 0.33	0.97 ± 0.14	0.97 ± 0.31	0.96 ± 0.41	1.00 ± 0.37
Alpha2	NA	1.31 ± 0.28	1.22 ± 0.50	1.11 ± 0.51	0.99 ± 0.47	1.01 ± 0.63	1.06 ± 0.68	1.09 ± 0.78	0.89 ± 0.60
		1 ± 0	0.96 ± 0.27	0.89 ± 0.25	0.78 ± 0.23	0.74 ± 0.29	0.78 ± 0.33	0.80 ± 0.48	0.76 ± 0.37
SD1	ms	3.10 ± 0.97	2.81 ± 0.64	2.69 ± 0.87	2.74 ± 1.03	2.88 ± 1.25	2.77 ± 0.95	2.94 ± 1.00	2.99 ± 0.93
		1 ± 0	0.95 ± 0.17	1.02 ± 0.21	1.04 ± 0.20	1.03 ± 0.24	1.06 ± 0.31	1.06 ± 0.30	1.08 ± 0.28
SD2	ms	5.96 ± 2.14	6.44 ± 3.01	4.86 ± 2.47	4.08 ± 1.44	4.77 ± 2.46	4.39 ± 1.49	4.42 ± 1.33	4.40 ± 1.74
		1 ± 0	0.89 ± 0.41	0.80 ± 0.38	0.72 ± 0.22	0.84 ± 0.32	0.76 ± 0.27	0.68 ± 0.37	0.67 ± 0.18
SD1SD2ratio	NA	0.53 ± 0.24	0.48 ± 0.39	0.62 ± 0.38	0.71 ± 0.21	0.67 ± 0.32	0.73 ± 0.22	0.71 ± 0.24	0.70 ± 0.26
		1 ± 0	0.98 ± 0.50	1.27 ± 0.49	1.44 ± 0.55	1.32 ± 0.66	1.52 ± 0.81	1.62 ± 0.75	1.64 ± 0.44
pLF	%	15.02 ± 12.75	14.32 ± 9.54	14.41 ± 13.25	11.75 ± 9.14	12.78 ± 9.16	13.91 ± 5.31	11.28 ± 4.39	11.44 ± 3.18
		1 ± 0	0.90 ± 0.31	0.83 ± 0.23	0.78 ± 0.35	0.85 ± 0.39	0.70 ± 0.42	0.69 ± 0.44	0.78 ± 0.46
pHF	%	84.98 ± 12.75	85.68 ± 9.54	85.59 ± 13.25	88.25 ± 9.14	87.22 ± 9.16	86.09 ± 5.31	88.72 ± 4.39	88.56 ± 3.18
		1 ± 0	1.02 ± 0.07	1.03 ± 0.04	1.04 ± 0.07	1.03 ± 0.07	1.04 ± 0.11	1.04 ± 0.10	1.04 ± 0.11
LF	ms^2	1.85 ± 0.92	1.77 ± 0.89	1.75 ± 1.20	1.90 ± 1.31	1.90 ± 1.16	1.85 ± 1.00	1.71 ± 0.41	1.84 ± 0.88
		1 ± 0	0.88 ± 0.20	0.89 ± 0.22	1.02 ± 0.24	0.93 ± 0.40	0.87 ± 0.24	0.89 ± 0.48	0.88 ± 0.32
HF	ms^2	11.13 ± 4.88	10.96 ± 5.58	12.75 ± 4.90	14.30 ± 3.35	14.00 ± 7.34	14.6618	3.68	13.97 ± 3.35
		1 ± 0	1.02 ± 0.37	1.15 ± 0.34	1.29 ± .36	1.24 ± 0.50	1.44 ± 0.60	1.43 ± 0.57	1.41 ± 0.41
LFHFratio	NA	0.18 ± 0.19	0.17 ± 0.13	0.17 ± 0.18	0.13 ± 0.12	0.15 ± 0.12	0.16 ± 0.07	0.13 ± 0.06	0.13 ± 0.04
		1 ± 0	0.89 ± 0.36	0.79 ± 0.24	0.75 ± 0.39	0.83 ± 0.45	0.64 ± 0.48	0.66 ± .48	0.73 ± 0.52
cardiac cost	bmps/ms^-1	15.12 ± 2.32	15.95 ± 4.04	14.27 ± 4.79	15.68 ± 4.19	16.59 ± 4.70	16.63 ± 3.80	16.27 ± 3.58	15.03 ± 3.11
		1 ± 0	1.05 ± 0.21	0.95 ± 0.20	1.02 ± 0.40	1.12 ± 0.37	1.12 ± 0.28	1.07 ± 0.15	1.09 ± 0.16
		0	0.2125	0.2004	0.3991	0.3678	0.2801	0.1538	0.1589
ROF		4 ± 2	5 ± 2	5 ± 2	6 ± 2	6 ± 2	7 ± 1	8 ± 2	9 ± 1
deltaROF		0 ± 0	1 ± 2	1 ± 1	2 ± 2	3 ± 1	3 ± 1	4 ± 2	5 ± 2
